# Supplementary material for: Intrastriatal Administration of AAV5-miHTT in Non-Human Primates and Rats Is Well Tolerated and Results in miHTT Transgene Expression in Key Areas of Huntington Disease Pathology
Source: MDPI journal article supplement (doi:10.3390/brainsci11020129), 2021-01-20
Supplement: s1 [file s1]

**Supplementary table 4.** Microscopic examination of the brain show astrocytes and microglial cell increases that are associated with the needle tract in rats 1 month after injection with vehicle or AAV5-miHTT. Data are number of male/female rats with minimal or slight increases in astrocytes or microglial cells associated with the needle tract at 1 month out of a total of 16 animals (eight male and eight female rats in each group).

| Cell type        | Controls<br>N=16                          | $4 \times 10^9$<br>N=16 | $4 \times 10^{10}$<br>N=16 | $4 \times 10^{11}$<br>N=16 |
|------------------|-------------------------------------------|-------------------------|----------------------------|----------------------------|
|                  | Number of male/female rats with increases |                         |                            |                            |
| Astrocytes       | 4/6                                       | 6/6                     | 5/5                        | 6/4                        |
| Microglial cells | 4/6                                       | 6/6                     | 6/5                        | 1/0                        |
