# Supplementary material for: Intrastriatal Administration of AAV5-miHTT in Non-Human Primates and Rats Is Well Tolerated and Results in miHTT Transgene Expression in Key Areas of Huntington Disease Pathology
Source: MDPI journal article supplement (doi:10.3390/brainsci11020129), 2021-01-20
Supplement: s1 [file s1]

# LUC HTT Exon1 reporter assay (25ng plasmid) in HEK293T cells

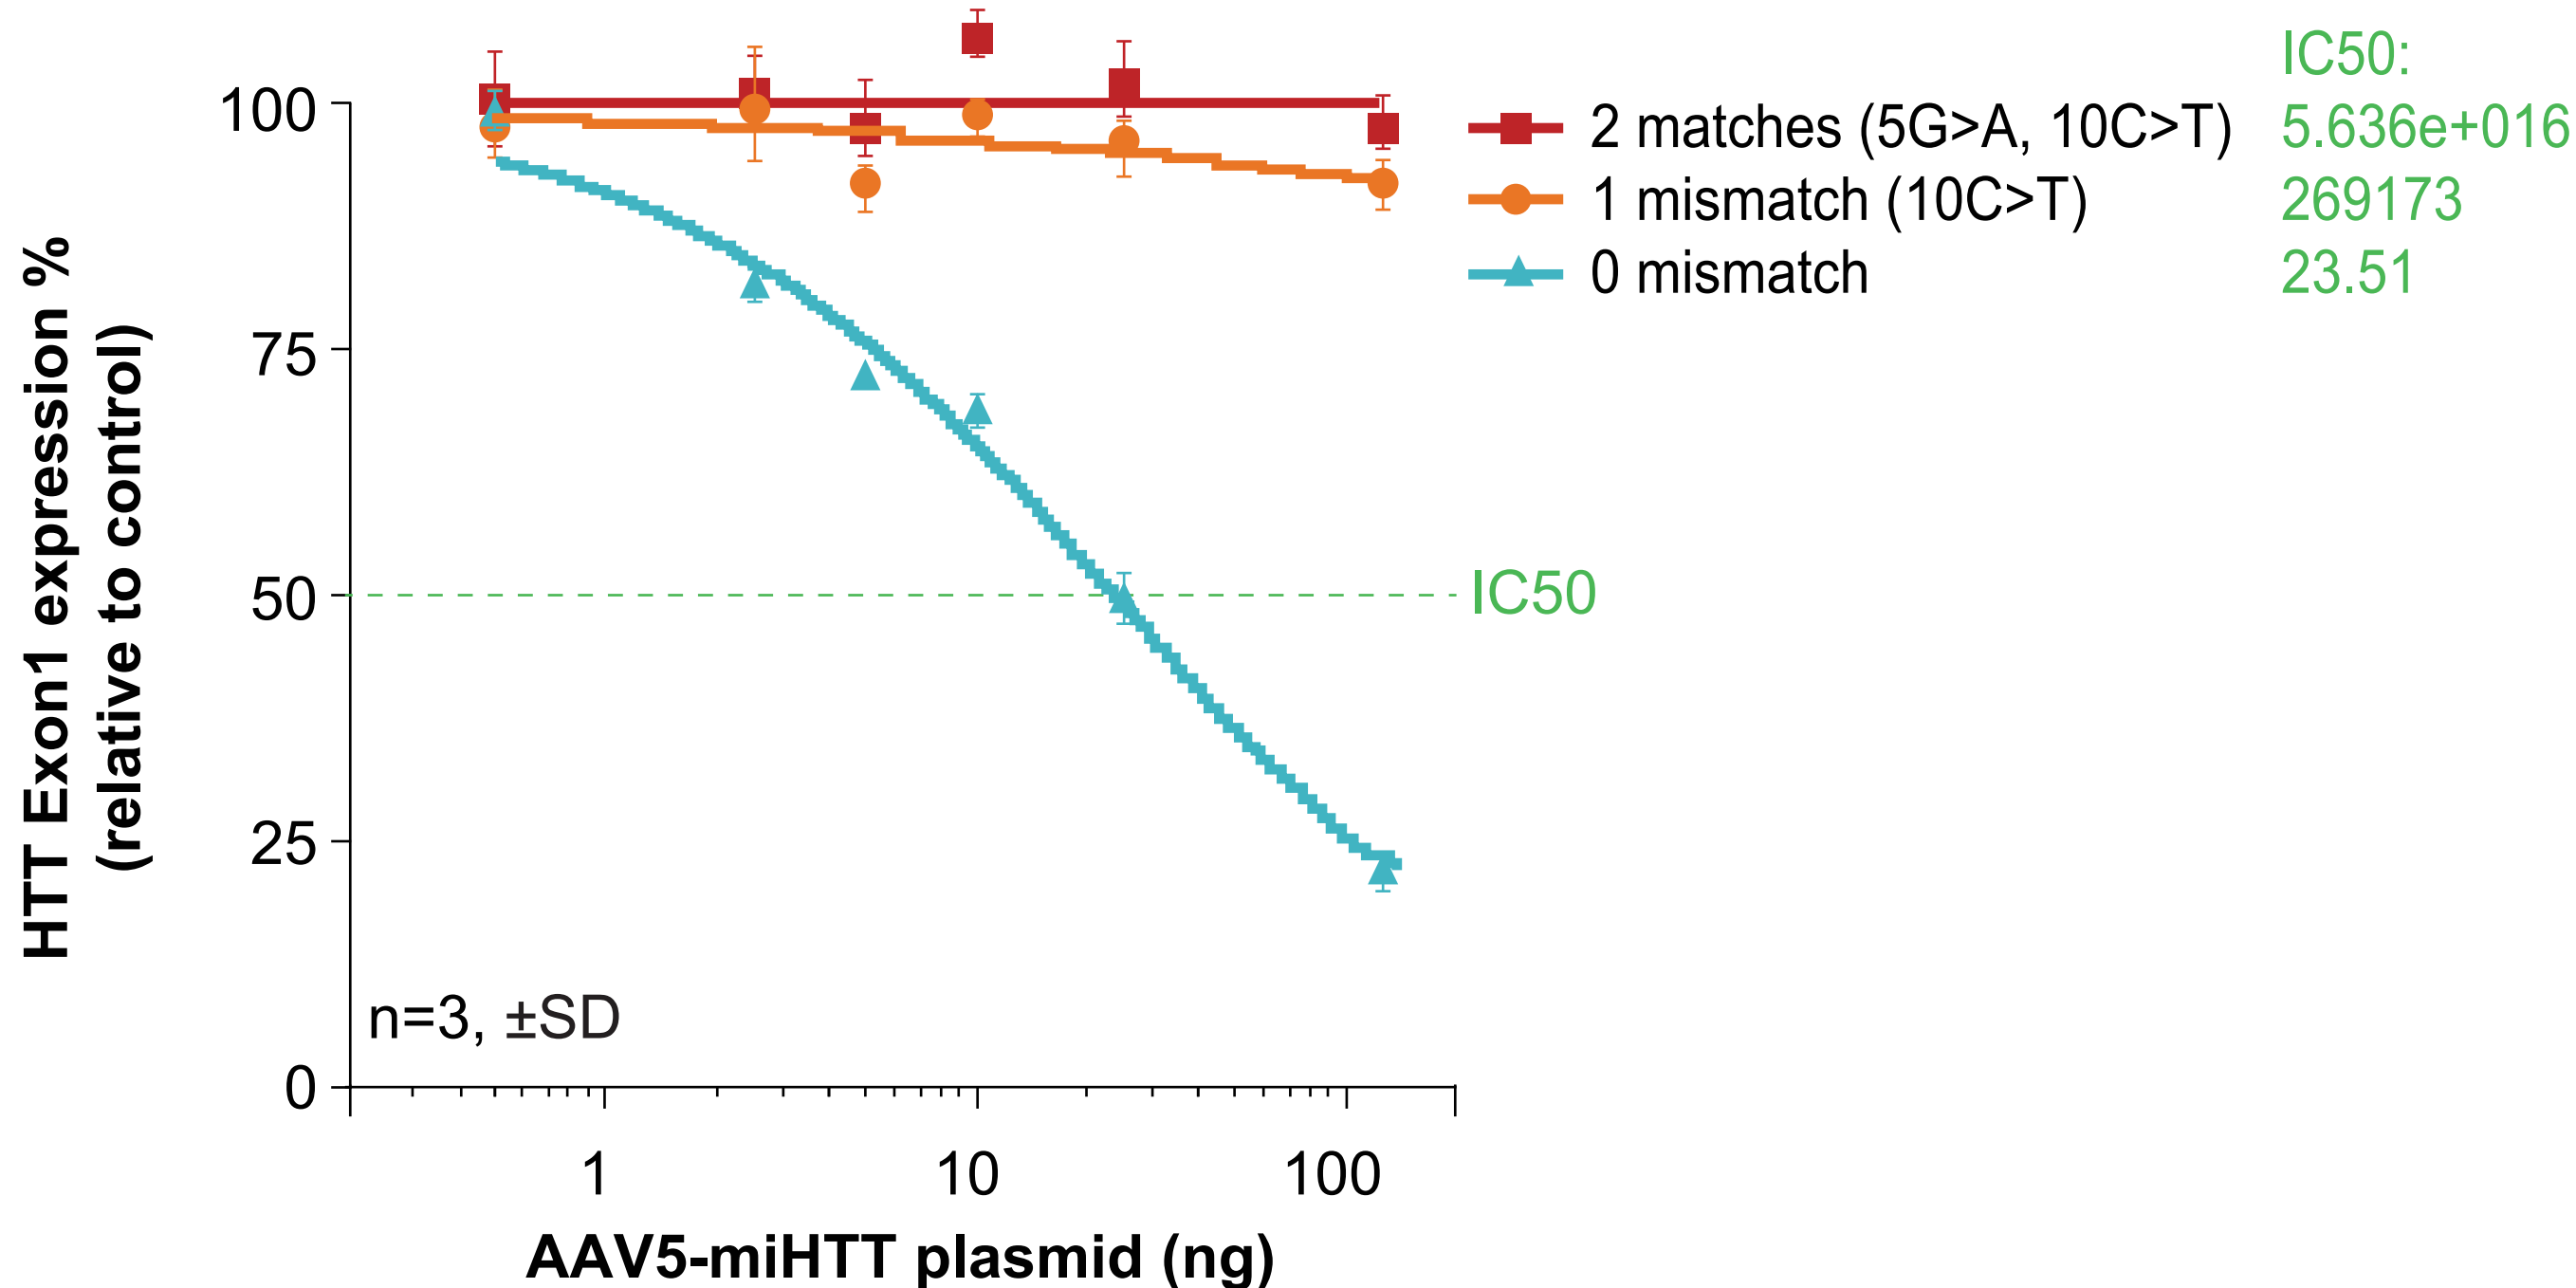

**Supplementary figure 1.** The Luciferase reporter assay showed a clear dose-dependent lowering of the luciferase reporter that has no mismatch to the AAV5-miHTT target sequence. The reporter with one mismatch, as is the case in the NHPs, did not show any lowering. Same holds true for the control reporter construct with 2 mismatches, confirming the validity of this assay.
