# Supplementary material for: Intrastriatal Administration of AAV5-miHTT in Non-Human Primates and Rats Is Well Tolerated and Results in miHTT Transgene Expression in Key Areas of Huntington Disease Pathology
Source: MDPI journal article supplement (doi:10.3390/brainsci11020129), 2021-01-20
Supplement: s1 [file s1]

**Supplementary table 2:** miHTT expression in off-target organs a) NHP and b) rat

a)

| Dose,<br>gc/brain  | miHTT expression in off-target organs in NHP (gc/μg of RNA) |                        |                             |                                                        |                                                        |              |                                                        |
|--------------------|-------------------------------------------------------------|------------------------|-----------------------------|--------------------------------------------------------|--------------------------------------------------------|--------------|--------------------------------------------------------|
|                    | Adrenal<br>gland                                            | Cervical<br>lymph node | Heart                       | Kidney                                                 | Liver                                                  | Spleen       | Ovaries                                                |
| 2x10 <sup>12</sup> | n=6<br><LLOQ                                                | n=6<br><LLOQ           | n=6<br><LLOQ                | n=5<br>4.04x10 <sup>3</sup><br>(9.98x10 <sup>2</sup> ) | n=6<br><LLOQ                                           | n=6<br><LLOQ | Not<br>analyzed                                        |
| 7x10 <sup>12</sup> | n=2<br>4.73x10 <sup>3</sup><br>(2.48x10 <sup>3</sup> )      | n=6<br><LLOQ           | n=1<br>5.11x10 <sup>3</sup> | n=1<br>3.34x10 <sup>3</sup>                            | n=2<br>4.79x10 <sup>3</sup><br>(1.51x10 <sup>3</sup> ) | n=6<br><LLOQ | Not<br>analyzed                                        |
| 2x10 <sup>13</sup> | n=3<br>6.12x10 <sup>3</sup><br>(3.54x10 <sup>3</sup> )      | n=6<br><LLOQ           | n=1<br>4.22x10 <sup>3</sup> | n=6<br><LLOQ                                           | n=4<br>5.57x10 <sup>3</sup><br>(1.38x10 <sup>3</sup> ) | n=6<br><LLOQ | n=3<br>2.35x10 <sup>4</sup><br>(2.22x10 <sup>4</sup> ) |

Data are mean (standard deviation). N=6 for all tissues except ovaries (N=3). Where lower, n represents positively determined concentration of vector DNA. LLOQ was 25 copies/reaction. gc, genome copies; LLOQ, lower limit of quantification; miHTT, micro RNA targeting *HTT*; NHP, non-human primates.

b)

| Time,<br>months<br>post dose | miHTT expression in off-target organs in rats (gc/μg of RNA) |                             |               |                                                        |                                                        |                                                        |
|------------------------------|--------------------------------------------------------------|-----------------------------|---------------|--------------------------------------------------------|--------------------------------------------------------|--------------------------------------------------------|
|                              | Adrenal<br>gland                                             | Cervical<br>lymph node      | Liver         | Lung                                                   | Spinal cord                                            | Spleen                                                 |
| 1                            | n=6<br>1.80x10 <sup>4</sup><br>(1.14x10 <sup>4</sup> )       | n=1<br>2.86x10 <sup>3</sup> | n=10<br><LLOQ | n=10<br><LLOQ                                          | n=10<br><LLOQ                                          | n=10<br><LLOQ                                          |
| 6                            | n=7<br>2.63x10 <sup>4</sup><br>(3.30x10 <sup>4</sup> )       | n=10<br><LLOQ               | n=10<br><LLOQ | n=2<br>3.98x10 <sup>3</sup><br>(6.15x10 <sup>2</sup> ) | n=5<br>4.81x10 <sup>3</sup><br>(1.43x10 <sup>3</sup> ) | n=2<br>5.54x10 <sup>3</sup><br>(3.93x10 <sup>3</sup> ) |

Data are mean (standard deviation). N=10 for all tissues. Where lower, n represents positively determined concentration of vector DNA. LLOQ was 2.5x10<sup>3</sup> copies/μg of RNA. gc, genome copies; LLOQ, lower limit of quantification; miHTT, micro RNA targeting *HTT*.
