# Supplementary material for: Intrastriatal Administration of AAV5-miHTT in Non-Human Primates and Rats Is Well Tolerated and Results in miHTT Transgene Expression in Key Areas of Huntington Disease Pathology
Source: MDPI journal article supplement (doi:10.3390/brainsci11020129), 2021-01-20
Supplement: s1 [file s1]

**Supplementary table 3. Clinical observations following AAV5-miHTT treatment in NHP or rats**

| <b>Clinical parameter</b>   | <b>Cynomolgus monkeys<br/>(<i>Macaca fascicularis</i>)</b>                | <b>CrI:CD(SD)<br/>Sprague Dawley rats</b>                                  |
|-----------------------------|---------------------------------------------------------------------------|----------------------------------------------------------------------------|
| Neurological assessment     | Transient absence of reflex responses at an incidence similar to controls | Not reported                                                               |
| Ophthalmic assessment       | No treatment effect                                                       | Not reported                                                               |
| Body weight                 | No treatment effect                                                       | Differences from controls were of small magnitude and within normal ranges |
| Food consumption            | No treatment effect                                                       | No treatment effect                                                        |
| Water consumption           | No treatment effect                                                       | No treatment effect                                                        |
| Body temperature            | No treatment effect                                                       | No treatment effect                                                        |
| Peripheral Blood hematology | No treatment effect                                                       | No treatment effect                                                        |
| Blood Chemistry             | No treatment effect                                                       | Differences considered unlikely to be treatment related                    |
| Organ weight                | No treatment effect                                                       | No treatment effect                                                        |
| Macropathology              | No treatment effect                                                       | No treatment-related lesions                                               |
