# Supplementary material for: Intrastriatal Administration of AAV5-miHTT in Non-Human Primates and Rats Is Well Tolerated and Results in miHTT Transgene Expression in Key Areas of Huntington Disease Pathology
Source: MDPI journal article supplement (doi:10.3390/brainsci11020129), 2021-01-20
Supplement: s1 [file s1]

**Supplementary table 1. Clinical measures in a) NHP study and b) rat study**

a) Clinical measures and timepoints in NHP study

| Measures                                                                                                                                                                                                                                                                                                                                                         | Frequency                                                                                                                                                                                                                                                                                                                              |
|------------------------------------------------------------------------------------------------------------------------------------------------------------------------------------------------------------------------------------------------------------------------------------------------------------------------------------------------------------------|----------------------------------------------------------------------------------------------------------------------------------------------------------------------------------------------------------------------------------------------------------------------------------------------------------------------------------------|
| <b>Living animals</b>                                                                                                                                                                                                                                                                                                                                            |                                                                                                                                                                                                                                                                                                                                        |
| Vector DNA in CSF                                                                                                                                                                                                                                                                                                                                                | Day 0, 1, month 1, 3, 6                                                                                                                                                                                                                                                                                                                |
| Vector DNA in bodily fluids (semen, urine, feces, saliva, nasal swab, blood)                                                                                                                                                                                                                                                                                     | CSF: pre-dose, day 1 and 1-, 3-, 4- and 6-months after dosing<br>Semen: 1-, 3- and 6-months after dosing<br>Urine, feces: day 7 and 1-, 2-, 3- and 6-months after dosing<br>saliva, nasal swab: day 7 and 1-, 2- and 3-months after dosing<br>Blood and plasma: pre-dose, day 1, day 2, day 7 and 1-, 2-, 3- and 6-months after dosing |
| Morbidity and mortality/clinical examination                                                                                                                                                                                                                                                                                                                     | Twice daily                                                                                                                                                                                                                                                                                                                            |
| Post-dose observations                                                                                                                                                                                                                                                                                                                                           | Once on Day 1, and during cage checks (morning and afternoon)                                                                                                                                                                                                                                                                          |
| Body weight                                                                                                                                                                                                                                                                                                                                                      | Twice pre-dose, weekly during dosing and the day prior to termination                                                                                                                                                                                                                                                                  |
| Physical and neurological examinations                                                                                                                                                                                                                                                                                                                           | Twice pre-dose, daily during the first week postdosing (from Day 2 onwards), every 2 weeks thereafter, and prior to termination.                                                                                                                                                                                                       |
| Ophthalmic examination                                                                                                                                                                                                                                                                                                                                           | Once during the pre-dose phase, 1, 3 and 6 Months after dosing                                                                                                                                                                                                                                                                         |
| Cardiovascular investigations (electrocardiography, blood pressure)                                                                                                                                                                                                                                                                                              | Once during the pre-dose phase, 1, 3 and 6 Months after dosing                                                                                                                                                                                                                                                                         |
| Respiratory rate                                                                                                                                                                                                                                                                                                                                                 | Once during the pre-dose phase (morning), Day 1 (prior surgery/dosing), day 2, day 3 and 1-, 3- and 6-Months after dosing                                                                                                                                                                                                              |
| Magnetic Resonance Imaging (MRI) Assessment                                                                                                                                                                                                                                                                                                                      | 3 and 6 Months after dosing                                                                                                                                                                                                                                                                                                            |
| Hematology (Hct, Hb, RBC, Retic, MCH, MCHC, MCV, WBC, N, L, E, B, M, LUC, Plt)                                                                                                                                                                                                                                                                                   | Twice during the pre-dose phase, Day 2 (non-fasted), Day 8 and 1-, 3- and 6-Months after dosing                                                                                                                                                                                                                                        |
| Coagulation (Prothrombin Time [PT], Activated Partial Thromboplastin Time [APTT])                                                                                                                                                                                                                                                                                | Twice during the pre-dose phase, Day 2 (non-fasted), Day 8 and 1-, 3- and 6-Months after dosing                                                                                                                                                                                                                                        |
| Clinical chemistry (ALP, ALT, AST, Bili, Urea, Creat, Gluc, Chol, Trig, Na, K, Cl, Ca, Phos, Total Prot, Alb, A/G Ratio, GLDH, GGT, Glob)                                                                                                                                                                                                                        | Twice during the pre-dose phase, Day 2 (non-fasted), Day 8 and 1-, 3- and 6-Months after dosing                                                                                                                                                                                                                                        |
| Urinalysis                                                                                                                                                                                                                                                                                                                                                       | Once during the pre-dose phase, Months 1, 3 and 6                                                                                                                                                                                                                                                                                      |
| Cytokine analysis (IFN- $\gamma$ , IL-4, TNF- $\alpha$ , IL-6, MCP-1, IL-8, IL-1 $\beta$ , IL-10, IL-2)                                                                                                                                                                                                                                                          | Once pre-dose (week before first dose), Days 2, 4, 8                                                                                                                                                                                                                                                                                   |
| <b>Necropsy</b>                                                                                                                                                                                                                                                                                                                                                  |                                                                                                                                                                                                                                                                                                                                        |
| Macroscopic examination                                                                                                                                                                                                                                                                                                                                          | Post-termination                                                                                                                                                                                                                                                                                                                       |
| Organ weights and tissue sections                                                                                                                                                                                                                                                                                                                                | Post-termination                                                                                                                                                                                                                                                                                                                       |
| AAV5 nAb                                                                                                                                                                                                                                                                                                                                                         | Post-termination                                                                                                                                                                                                                                                                                                                       |
| Vector DNA, miHTT and HTT protein in tissues (Adrenals, Brain (punches from all brain regions), deep cervical lymph nodes, eyes, bone marrow femur, mammary glands, heart, ileum, kidney, liver, lungs, ovaries, pancreas, pituitary, prostate, salivary glands, seminal vesicles, skeletal muscle, spinal cord, spleen, testes, thymus, thyroid, uterus/cervix) | Post-termination Tissue collected (male/female where applicable)                                                                                                                                                                                                                                                                       |

B) Clinical measures and timepoints in Rat study

| Measures                                                                             | Frequency   |
|--------------------------------------------------------------------------------------|-------------|
| <b>Living animals</b>                                                                |             |
| Clinical observation (visual check for evidence of ill health or treatment reaction) | Twice daily |

|                                                                                                                                                                                                                                                                                                                                                                                                                                      |                                                                                                                                           |
|--------------------------------------------------------------------------------------------------------------------------------------------------------------------------------------------------------------------------------------------------------------------------------------------------------------------------------------------------------------------------------------------------------------------------------------|-------------------------------------------------------------------------------------------------------------------------------------------|
| Detailed observations around dosing                                                                                                                                                                                                                                                                                                                                                                                                  | Pre-dose (surgical site observation), 2 and 4 hours after dosing and as late as possible in the working day following dose administration |
| Surgical site assessment for site reactions or healing                                                                                                                                                                                                                                                                                                                                                                               | Daily until any reaction was resolved or the surgical site was healed, and at termination                                                 |
| Body Weight                                                                                                                                                                                                                                                                                                                                                                                                                          | Weekly starting the week before treatment                                                                                                 |
| Food Consumption                                                                                                                                                                                                                                                                                                                                                                                                                     | Weekly starting the week before treatment                                                                                                 |
| Water consumption                                                                                                                                                                                                                                                                                                                                                                                                                    | The week before treatment Weeks 1, Months 1, 2, 3 and 6                                                                                   |
| Body temperature                                                                                                                                                                                                                                                                                                                                                                                                                     | Pre dose, 24 h post dose, Day 4, Months 1, 3 and 6                                                                                        |
| Hematology (Hct,* Hb, RBC, Retic, MCH,* MCHC,* MCV, RDW, WBC, N, L, E, B, M, LUC, Plt)                                                                                                                                                                                                                                                                                                                                               | Day 8, Months 1, 3 and 6                                                                                                                  |
| Blood chemistry (ALP, ALT, AST, Bili, Urea, Creat, Gluc, Chol, Trig, Na, K, Cl, Ca, Phos, Total Prot, Alb, A/G Ratio)                                                                                                                                                                                                                                                                                                                | Day 8, Months 1, 3 and 6                                                                                                                  |
| Vector DNA in body fluids (urine, feces, saliva, plasma)                                                                                                                                                                                                                                                                                                                                                                             | Day 1 (4- and 24-hours post dose), Day 8, Months 1, 3 and 6                                                                               |
| Assessment of Anti-AAV5 Antibody Level                                                                                                                                                                                                                                                                                                                                                                                               | Prior to termination                                                                                                                      |
| Cytokine levels                                                                                                                                                                                                                                                                                                                                                                                                                      | Day 1 (4- and 24-hours post dose), Days 4, 8 and 15                                                                                       |
| <b>Necropsy</b>                                                                                                                                                                                                                                                                                                                                                                                                                      |                                                                                                                                           |
| Macroscopic examination                                                                                                                                                                                                                                                                                                                                                                                                              | Post-termination tissues                                                                                                                  |
| Organ weights and tissue sections                                                                                                                                                                                                                                                                                                                                                                                                    | Post-termination tissues                                                                                                                  |
| Bone marrow smear                                                                                                                                                                                                                                                                                                                                                                                                                    | Post-termination tissues                                                                                                                  |
| Vector shedding in CSF and Vas Deferens                                                                                                                                                                                                                                                                                                                                                                                              | Post-termination                                                                                                                          |
| Vector DNA and miHTT in tissues<br>(Adrenals, bone with marrow, brain (striatum, cortex, cerebellum, rest), cecum, colon, duodenum, epididymides, eyes, harderian glands, heart, ileum, jejunum, kidney, liver, lung, axillary and deep cervical lymph nodes, ovaries, pancreas, prostate, seminal vesicle, skeletal muscle, skin with mammary glands, spinal cord, spleen, stomach, testes, thymus, bladder, uterus/cervix, vagina) | Post-termination tissues:                                                                                                                 |

\* Derived values calculated in ClinAxys (Clinical Systems Ltd., Cambridgeshire, UK).

**Abbreviations:**

A/G ratio; albumin/globulin ratio; Alb, albumin; ALP, alkaline phosphatase; ALT, alanine aminotransferase; AST aspartate aminotransferase; B, basophils; Bili, total bilirubin; Ca, calcium; Chol, total cholesterol; Cl, chloride; Creat, creatinine; CSF, cerebrospinal fluid; e, eosinophils; GGT, gamma glutamyl transferase; GLDH, glutamate dehydrogenase; GLOB, globulin; Gluc, glucose; Hb, hemoglobin concentration; Hct,\*hematocrit; IFN- $\gamma$ , Interferon-gamma; IL-1 $\beta$ , Interleukin-1 beta; IL-2, Interleukin-2; IL-4, Interleukin-4; IL-6, Interleukin-6; IL-8, Interleukin-8; IL-10; interleukin-10; K, potassium; L, lymphocytes; LUC, large unstained cells; MCH, mean cell hemoglobin; MCHC, mean cell hemoglobin concentration; MCP-1, Monocyte Chemoattractant Protein 1; MCV, mean cell volume; M, monocytes; N, neutrophils; Na, sodium; Phos, inorganic phosphorus; Plt, platelet count; RBC, erythrocyte count; RDW, red cell distribution width; Retic, absolute reticulocyte count; TNF- $\alpha$  Tumor-Necrosis Factor alpha; Total prot, total protein; Trig, triglycerides WBC; total leucocyte counts.
