# Supplementary figures and images for: Intrastriatal Administration of AAV5-miHTT in Non-Human Primates and Rats Is Well Tolerated and Results in miHTT Transgene Expression in Key Areas of Huntington Disease Pathology
Source: MDPI journal article supplement (doi:10.3390/brainsci11020129), 2021-01-20

### Plasma vector DNA

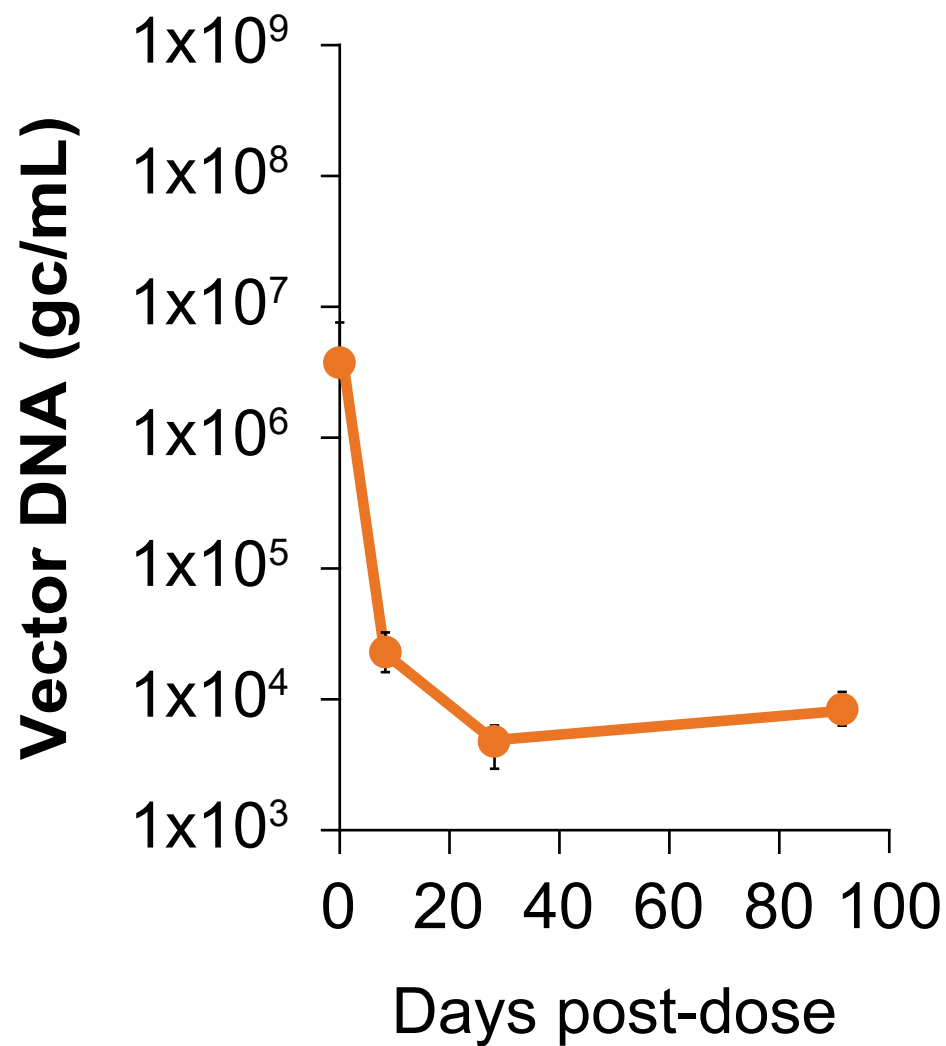

### Urine vector DNA

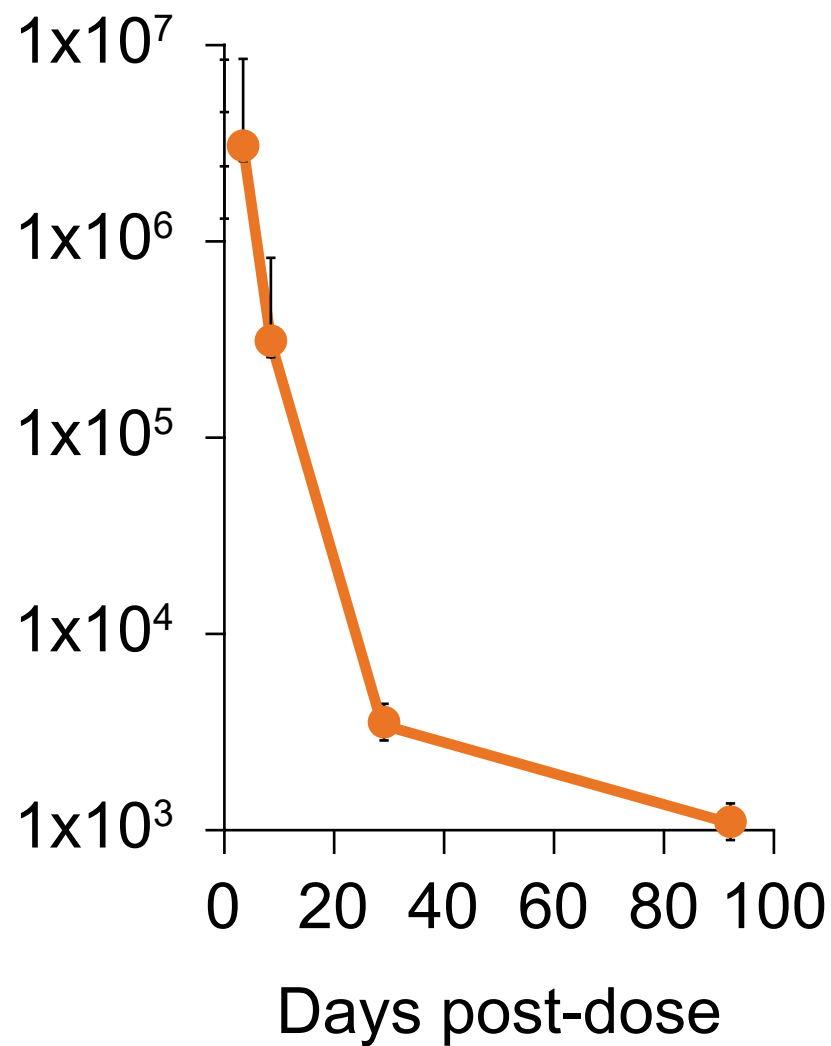

### Saliva vector DNA

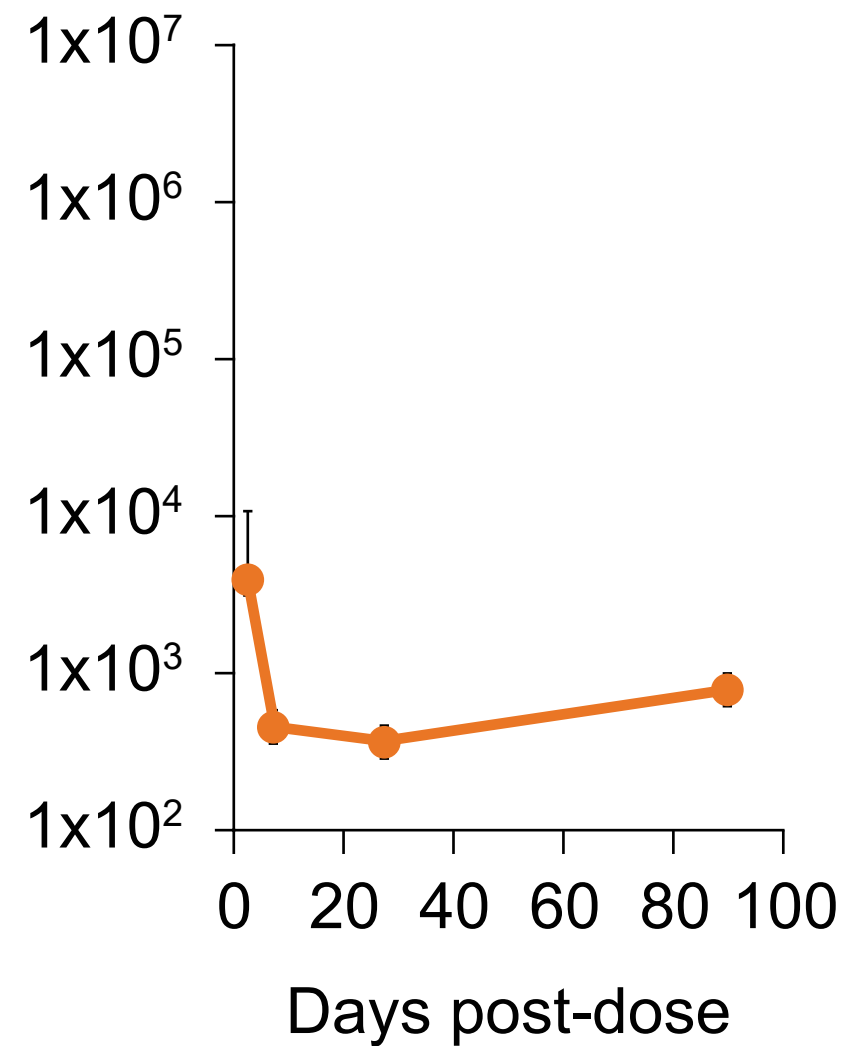

Supplement: s1 [file s1]

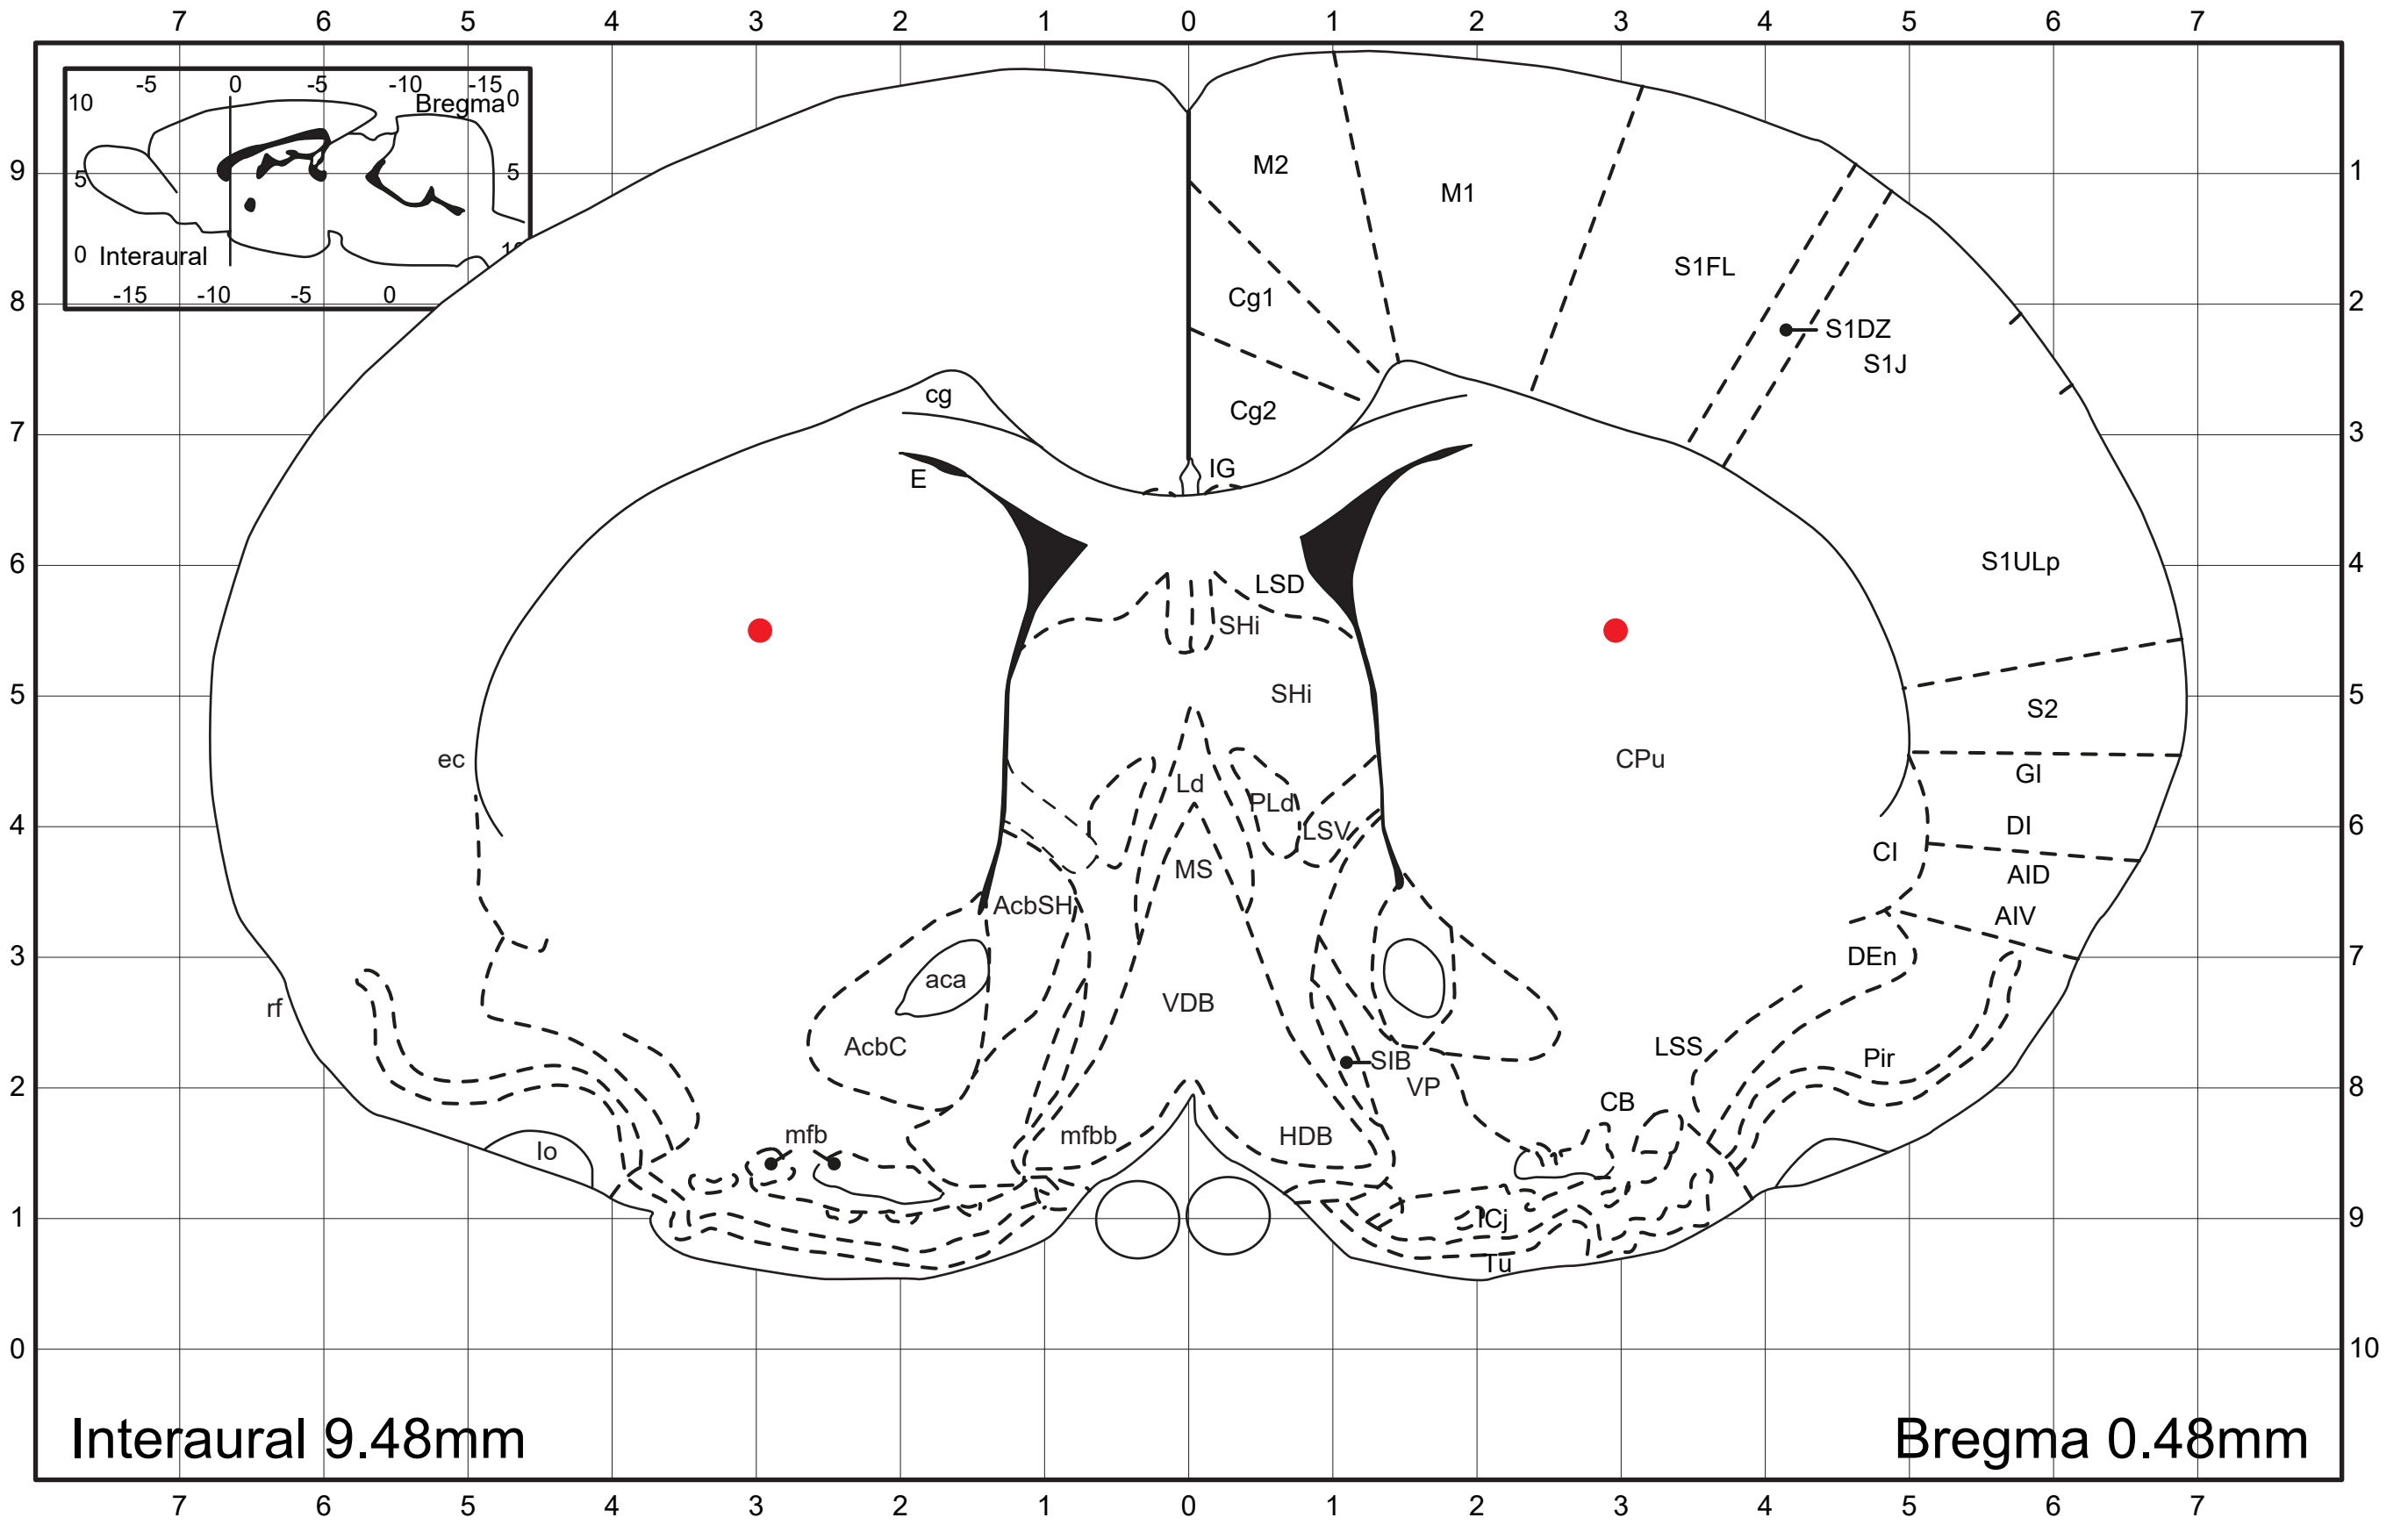

Interaural 9.48mm

Bregma 0.48mm

Supplement: s1 [file s1]

**A**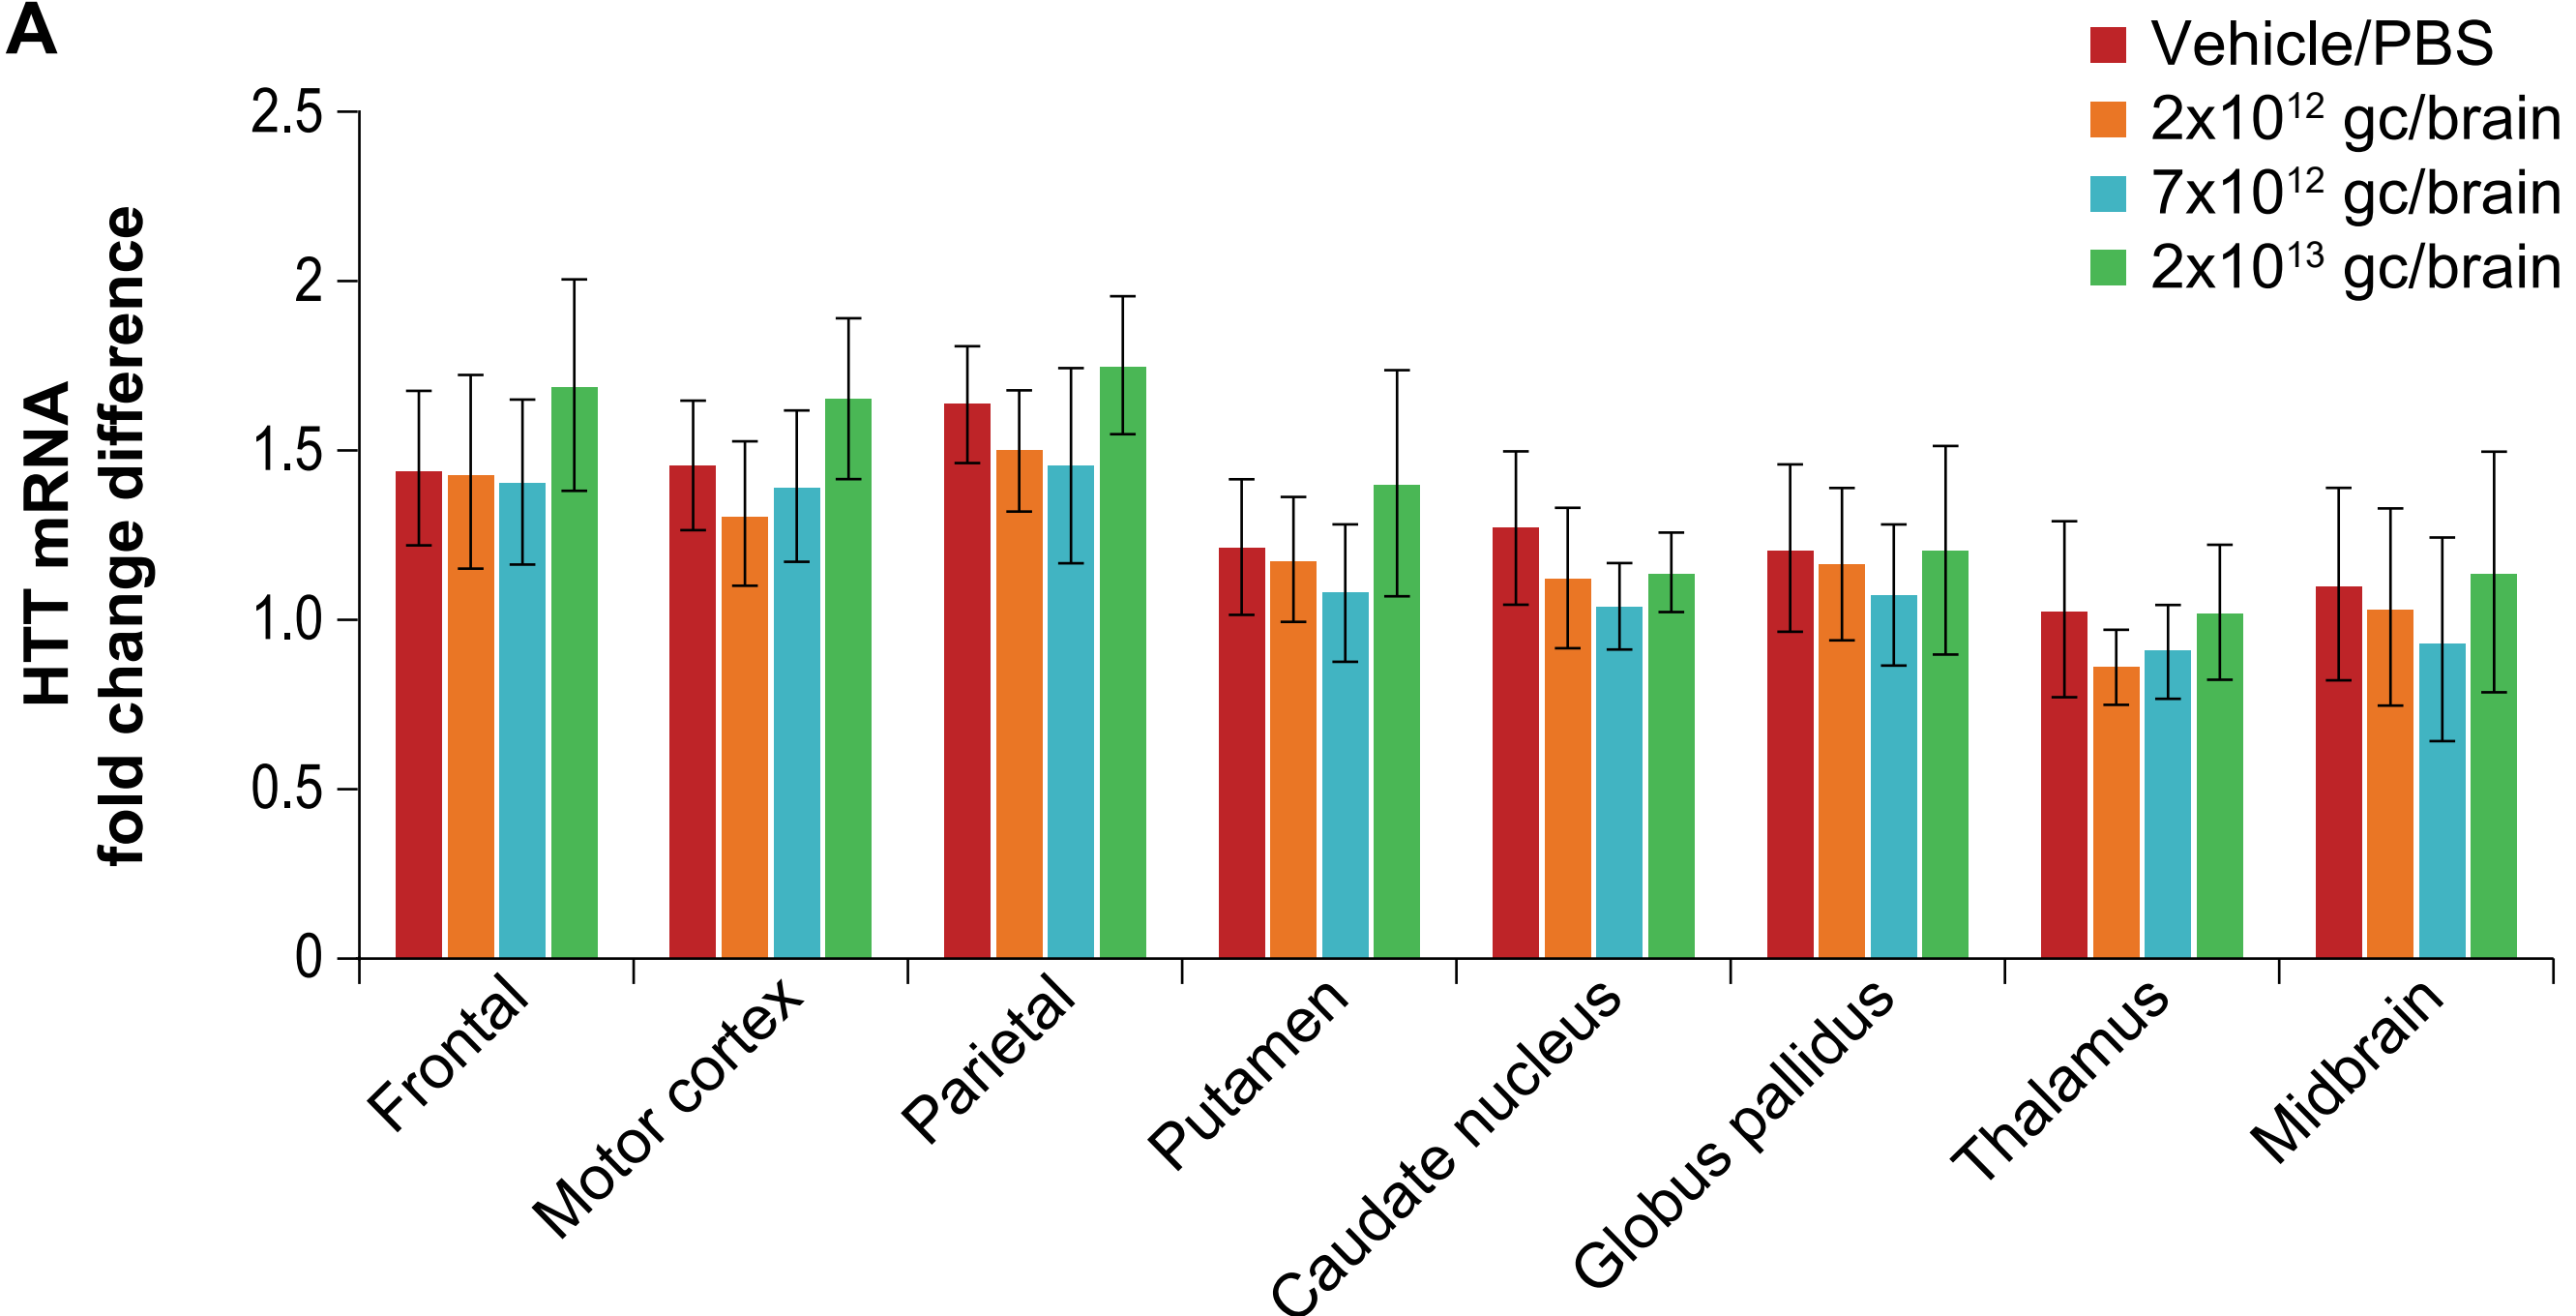**B**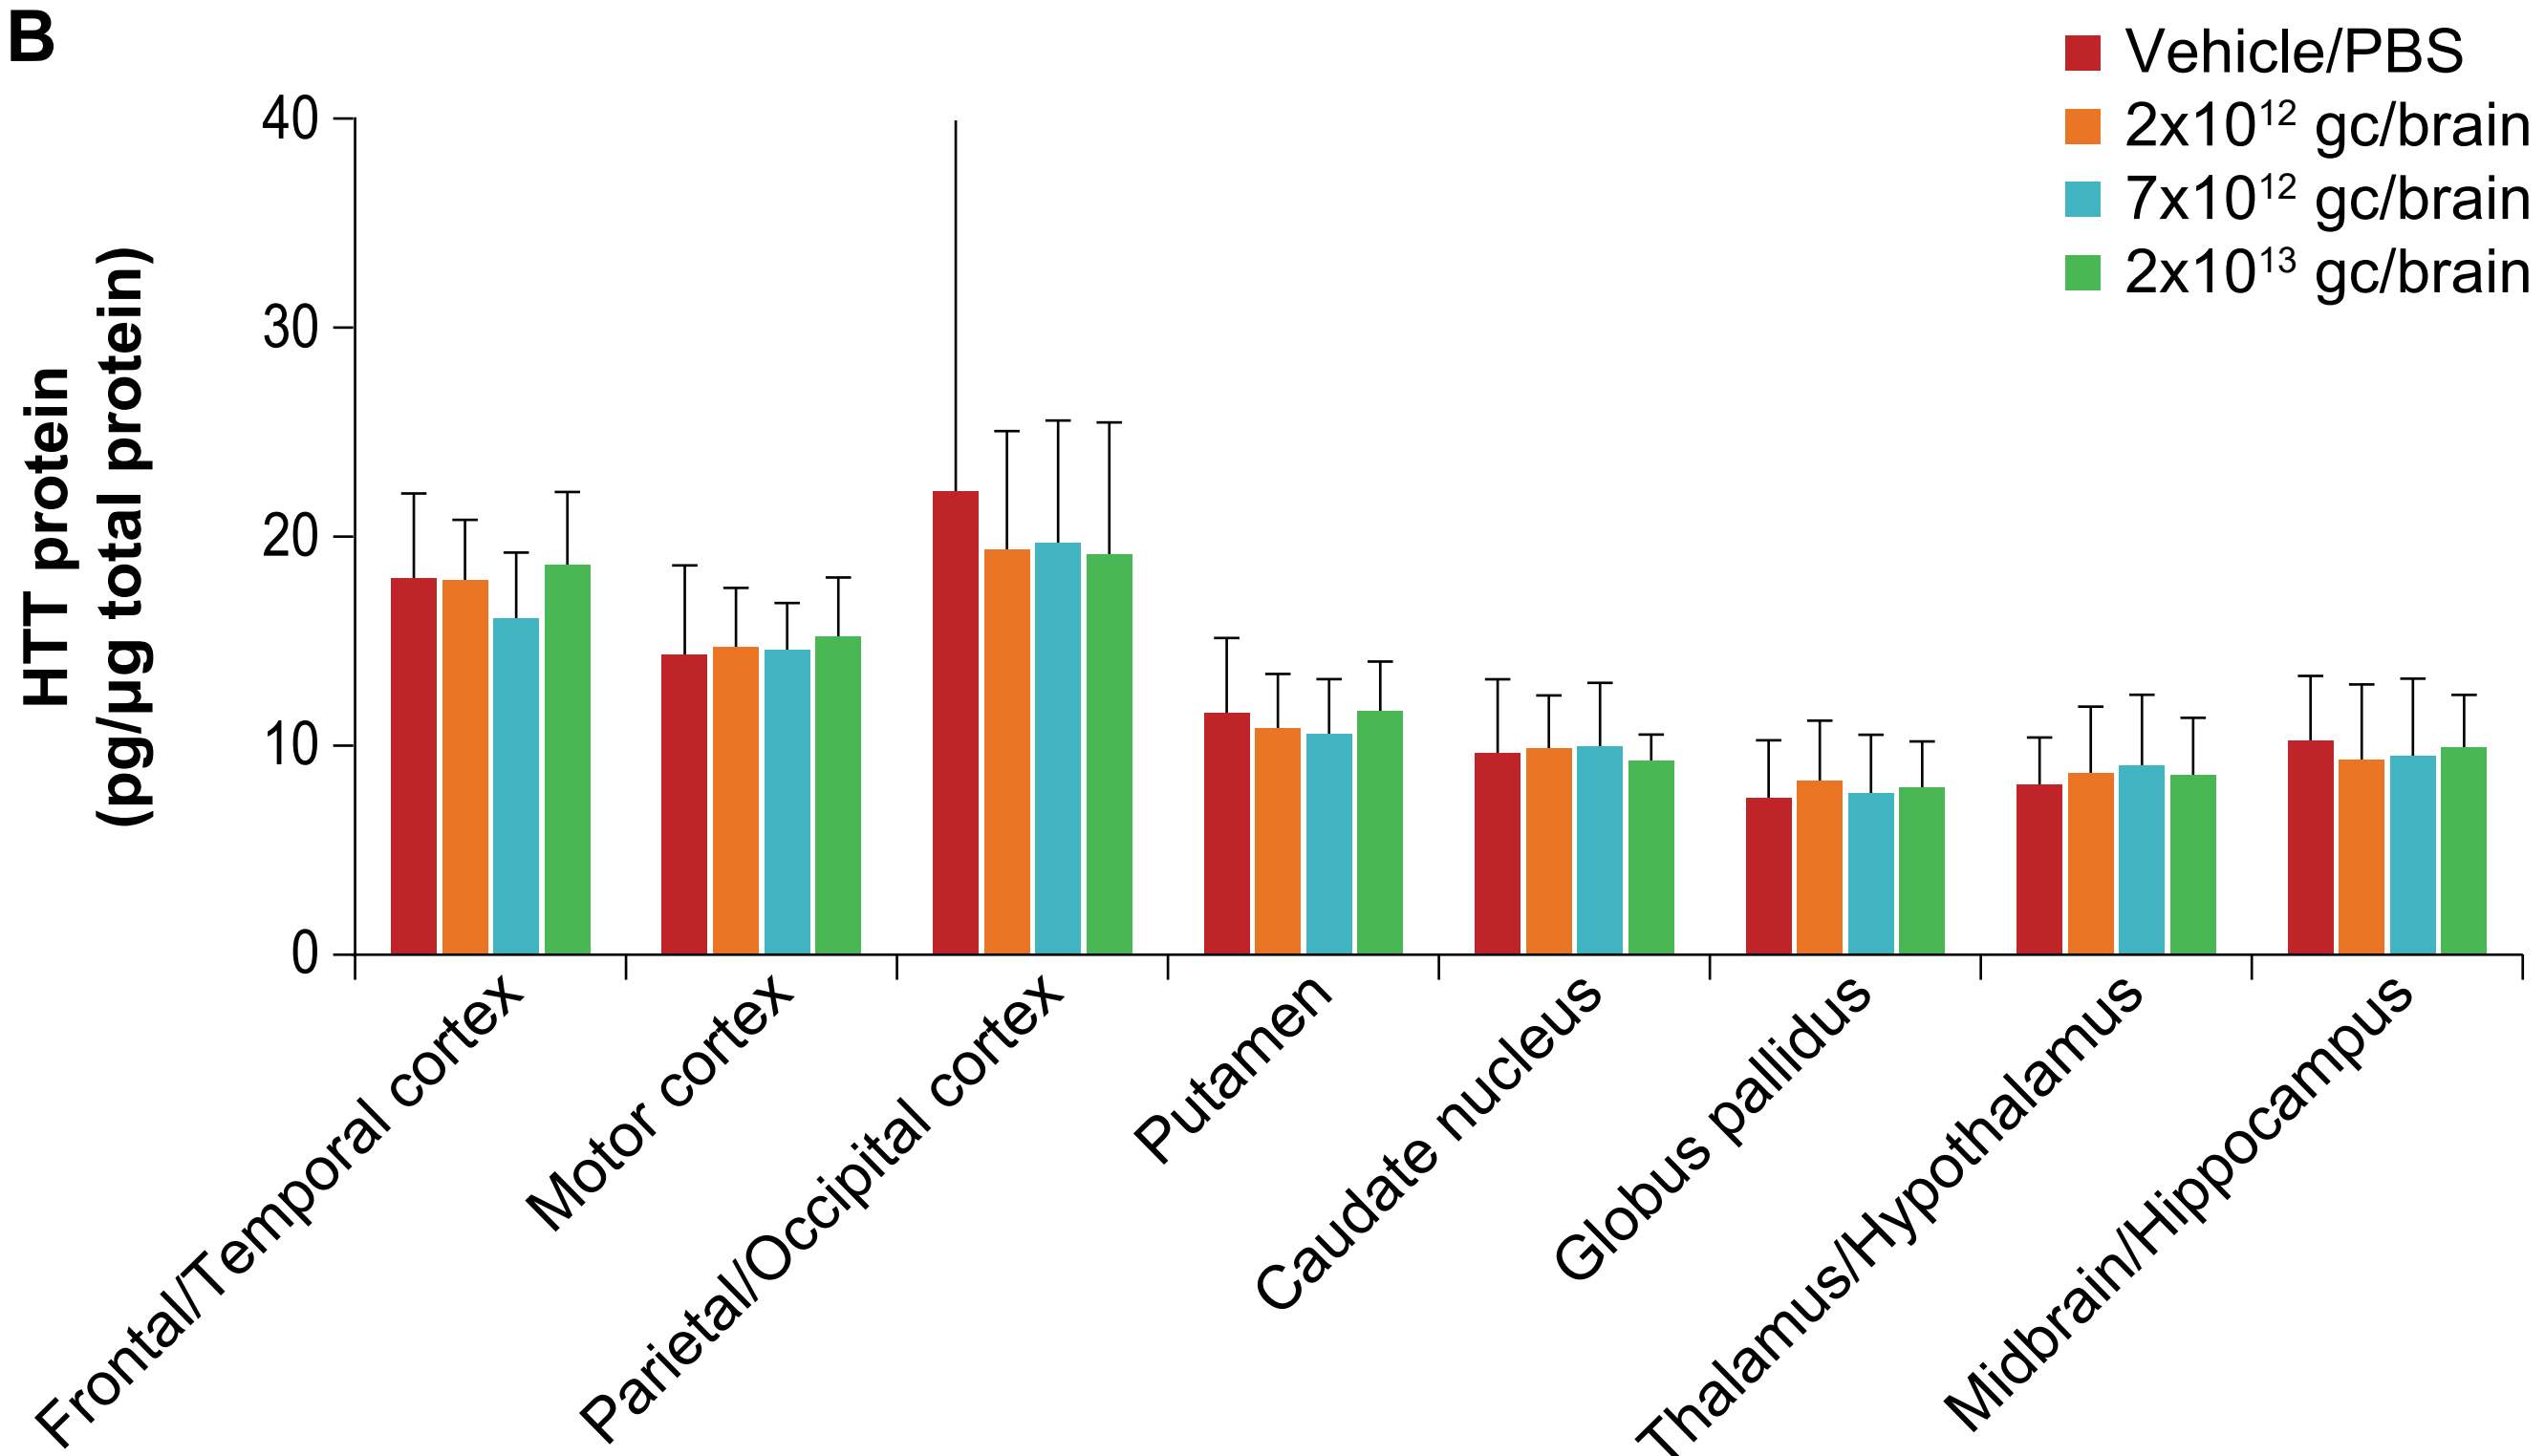

Supplementary figure 2. HTT mRNA gene expression (a) and HTT protein levels in the brain of NHP (b)

Supplement: s1 [file s1]
